# Supplementary material for: Amino Acid Changes in Disease-Associated Variants Differ Radically from Variants Observed in the 1000 Genomes Project Dataset
Source: PubMed Central journal article supplement (PMC3861039; doi:10.1371/journal.pcbi.1003382), 2013-12-12
Supplement: pcbi.1003382.s006.pdf [file pcbi.1003382.s006.pdf]

**Table S1.** The relative abundances of the various amino acids in the UniProt protein set.

| Amino acid | Abundance (%) |
|------------|---------------|
| R          | 5.63083133373 |
| K          | 5.79714973543 |
| D          | 4.76732370533 |
| E          | 7.13437004049 |
| N          | 3.6117363067  |
| Q          | 4.76916720684 |
| S          | 8.30266991827 |
| G          | 6.54206836837 |
| H          | 2.63812747102 |
| T          | 5.29415226919 |
| A          | 6.99852702309 |
| P          | 6.23374274109 |
| Y          | 2.66393649214 |
| V          | 5.92298791652 |
| M          | 2.15610943601 |
| C          | 2.2940936036  |
| L          | 9.99640613222 |
| F          | 3.69139093437 |
| I          | 4.35942979346 |
| W          | 1.19577957214 |
